# Supplementary material for: Efficient Gene Disruption via Base Editing Induced Stop in Newt Pleurodeles waltl
Source: MDPI journal article supplement (doi:10.3390/genes10110837), 2019-10-23
Supplement: s1 [file s1]

WT (9 months , ♂ )

albinism (9 months , ♂ )

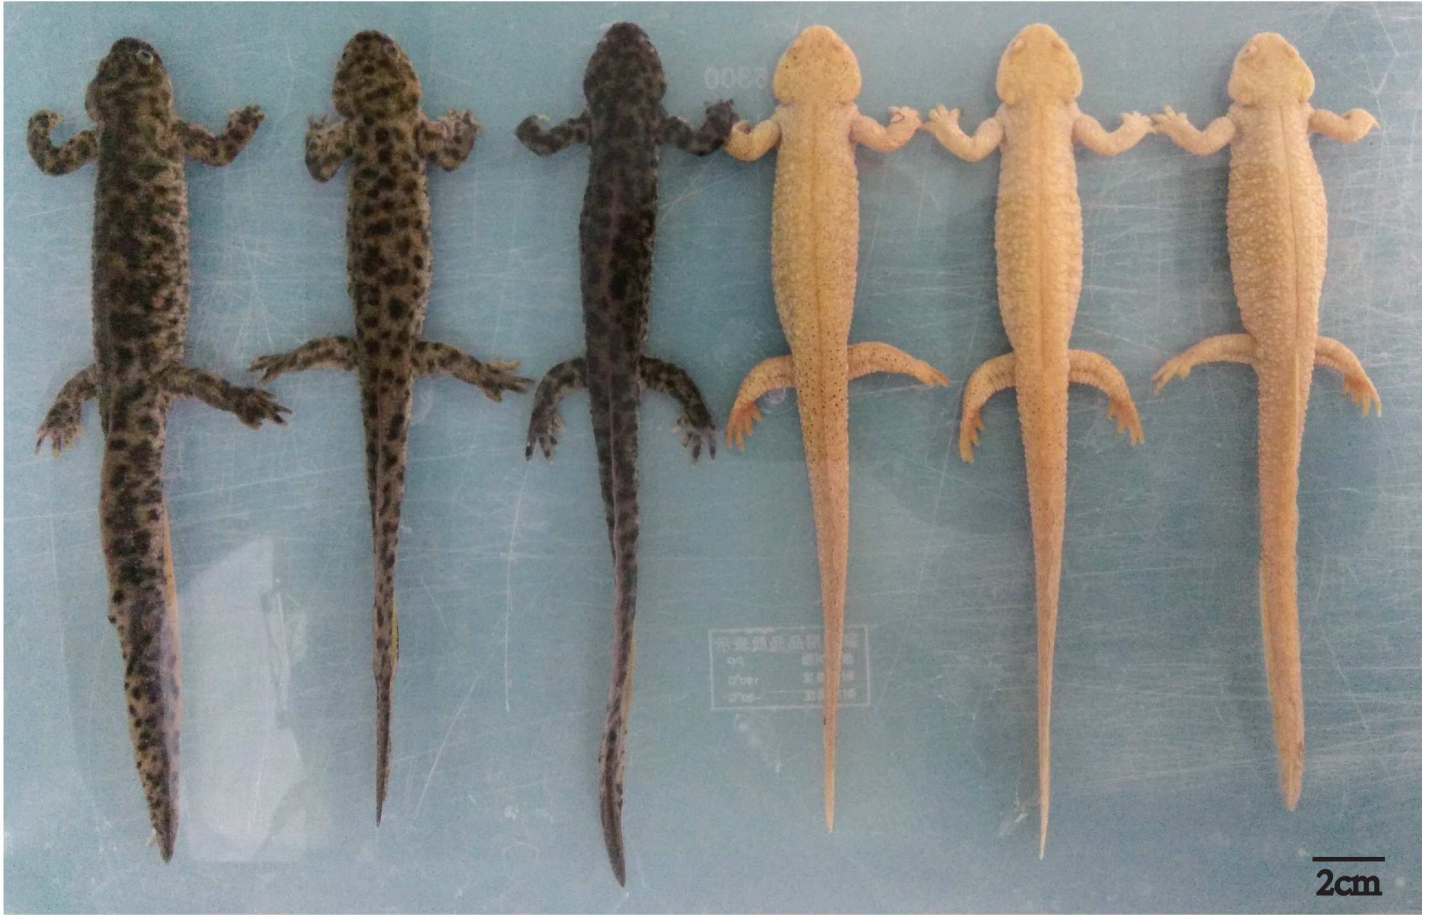

Figure S1. The base edited newts developed normally compare to the wild type animals. The multiplex sgRNAs induced iSTOP knockout in *tyrosinase* gene produced albino animals.
